# Supplementary material for: Photoinduced modification of the natural biopolymer poly(3-hydroxybutyrate-co-3-hydroxyvalerate) microfibrous surface with anthraquinone-derived dextran for biological applications
Source: Royal Society of Chemistry journal article supplement (doi:10.1039/c3tb20869a), 2013-01-01
Supplement: c3tb20869a.pdf [file c3tb20869a.pdf]

## SUPPORTING INFORMATION

### Photoinduced modification of natural biopolymer Poly(3-hydroxybutyrate-co-3-hydroxyvalerate) microfibrinous surface with anthraquinone-derived dextran for biological applications

Davy-Louis Versace<sup>\*a</sup>, Julien Ramier<sup>a</sup>, Julien Babinot<sup>a</sup>, Pierre Lemechko<sup>a</sup>, Olivier Soppera<sup>b</sup>, Jacques Lalevee<sup>b</sup>, Patricia Albanese<sup>c</sup>, Estelle Renard<sup>a</sup> and Valerie Langlois<sup>a</sup>.

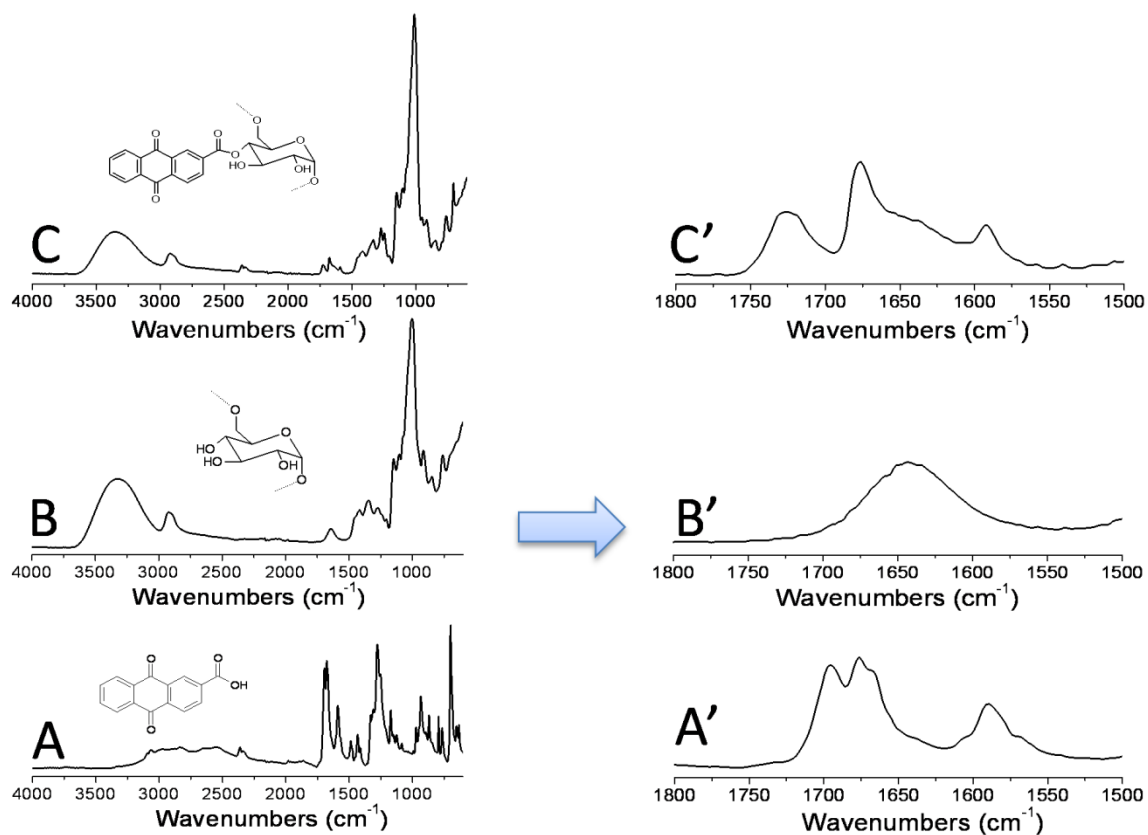

10 **Figure S1** ATR-FTIR spectra of A) Anthraquinone-2-carboxylic acid (AQ-COOH), B) Dextran and C) Photosensitive Dextran (AQ-Dext). A'), B') and C') display the ATR-FTIR spectra of AQ-COOH, Dextran and AQ-Dext respectively in the range 1500-1800  $\text{cm}^{-1}$ .

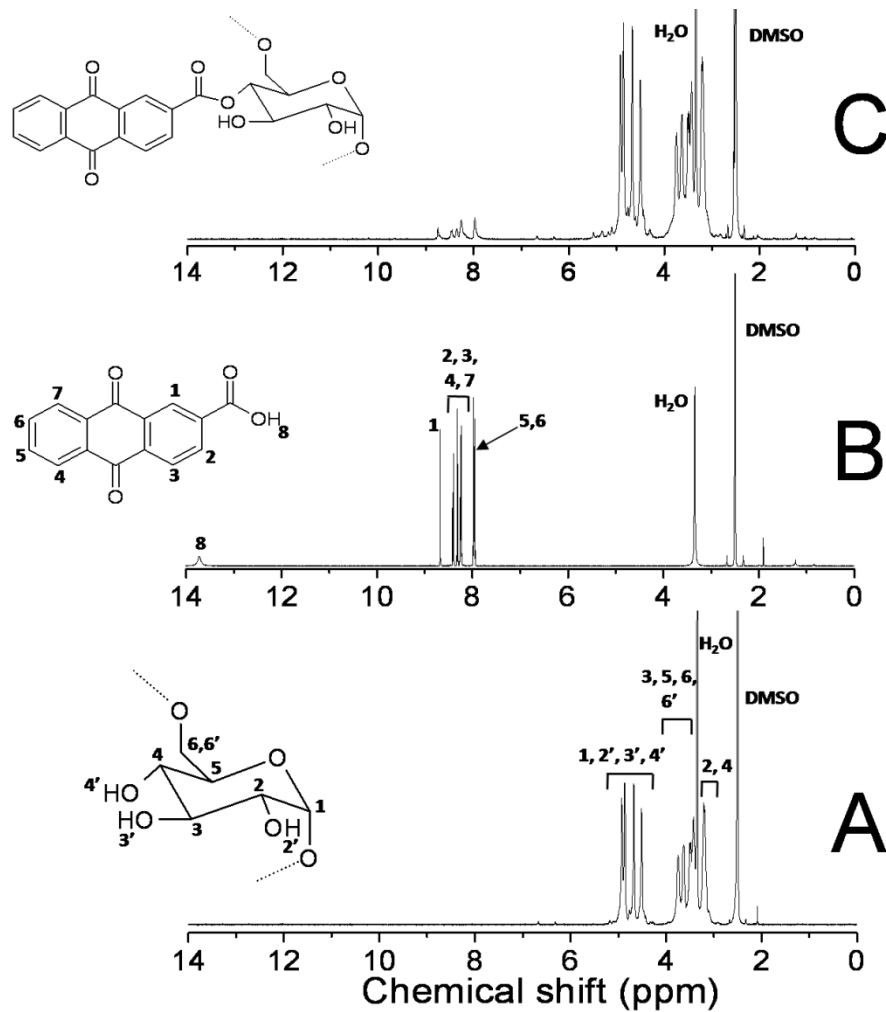

**Figure S2**  $^1\text{H}$  NMR spectra of: A) Dextran, B) Anthraquinone-2-carboxylic acid (AQ-COOH) and C) Photosensitive Dextran (AQ-Dext) in  $\text{DMSO-d}_6$ .

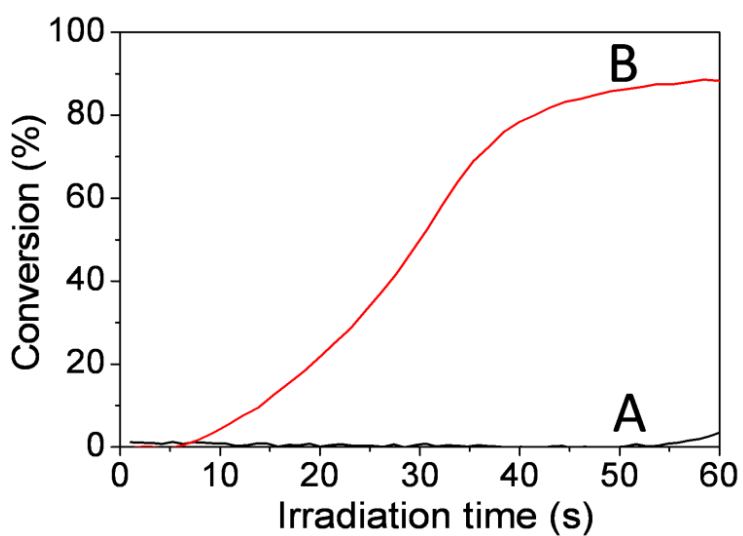

**Figure S3** Conversion profiles for the photopolymerization of an aqueous solution of acrylic acid in the presence of MDEA in laminated conditions without AQ-Dext (A) and with AQ-Dext (B). UV light intensity: 2.7 mW/cm<sup>2</sup>.
